# Supplementary material for: Resveratrol induces dephosphorylation of Tau by interfering with the MID1-PP2A complex
Source: PubMed Central journal article supplement (PMC5653760; doi:10.1038/s41598-017-12974-4), 2017-10-23
Supplement: 41598_2017_12974_MOESM1_ESM.pdf [file 41598_2017_12974_MOESM1_ESM.pdf]

**Title:** Resveratrol induces dephosphorylation of Tau by interfering with the MID1-PP2A complex

**Authors:** Susann Schweiger<sup>\*,a,#</sup>, Frank Matthes<sup>\*,b</sup>, Karen Posey<sup>c</sup>, Eva Kickstein<sup>d</sup>, Stephanie Weber<sup>b</sup>, Moritz M. Hettich<sup>b</sup>, Sandra Pfurtscheller<sup>e</sup>, Dan Ehninger<sup>b</sup>, Rainer Schneider<sup>e</sup>, Sybille Krauß<sup>#,b</sup>

***Supplementary Figures***

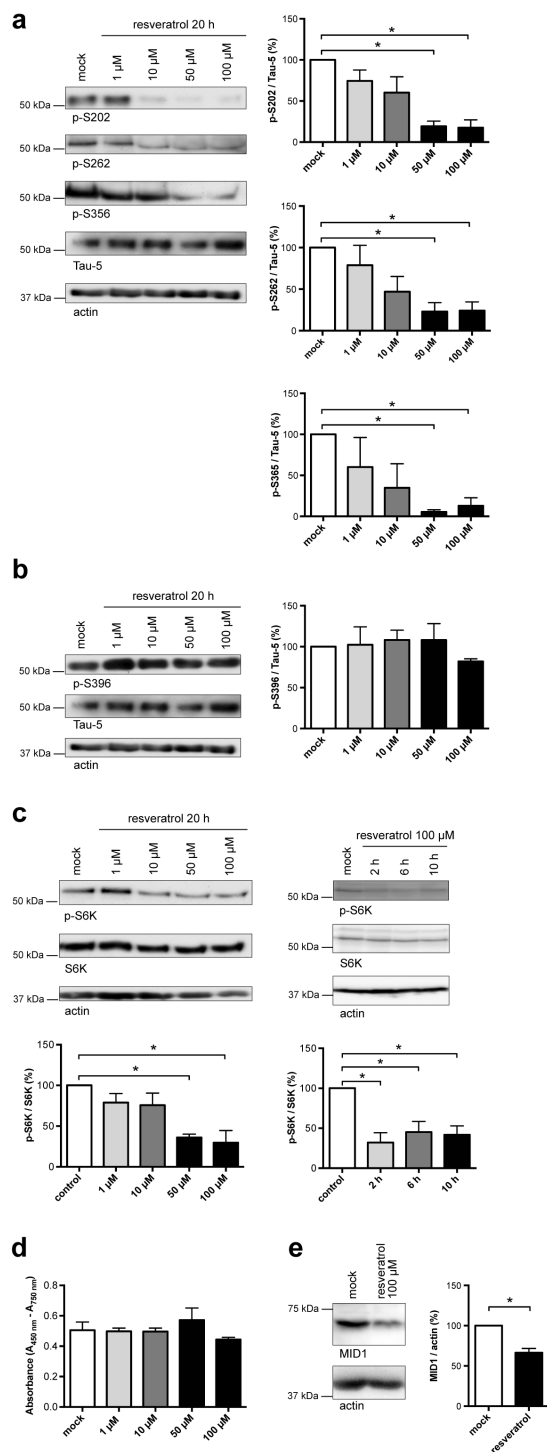

Supplementary Figure 1:

Resveratrol increases PP2A activity and dephosphorylates Tau at PP2A-sensitive sites in OLN-t40 cells.

(a) OLN-t40 cells were treated with increasing concentrations of resveratrol for 20 hours. Cell lysates were analysed on western blots using an antibody detecting Tau

phosphorylation at S202 (n = 4), S262 (n = 4), and S356 (n = 3), total Tau (Tau-5), and actin. \* p < 0.05 (b) OLN-t40 cells were treated with increasing concentrations of resveratrol for 20 hours. Cell lysates were analysed on western blots using antibodies detecting Tau phosphorylation at S396, total Tau (Tau-5), and actin as loading controls. n = 3. (c) OLN-t40 cells were treated with increasing concentrations of resveratrol for 20 hours (n = 4, \* p < 0.05) or with 100 µM resveratrol over increasing time intervals (n = 5, \* p < 0.05). Cell lysates were analysed on western blots using antibodies detecting phospho-S6K, total S6K, and actin. (d) Cell viability is not affected by resveratrol. OLN-t40 cells were treated with increasing concentrations of resveratrol for 20 hours and cell viability was measured in a WST-1 assay. Columns represent mean values +/- SEM. (n = 9). (e) Resveratrol reduces MID1 protein level. OLN-t40 cells were treated with 100 µM resveratrol for 20 hours. Cell lysates were analysed on western blots using antibodies detecting MID1 and actin as loading control (n = 3, \* p < 0.05).
